1  
2  
3  
4  
5  
6  
7  
8  
9  
10  
11  
12  
13  
14  
15  
16  
17  
18  
19  
20  
21  
22  
23  
24  
25  
26

## RESEARCH PAPER

### **Anaesthesia with diethyl ether impairs jasmonate signalling in the carnivorous plant Venus flytrap (*Dionaea muscipula*).**

Andrej Pavlovič<sup>1\*</sup>, Michaela Libiaková<sup>2</sup>, Boris Bokor<sup>2,3</sup>, Jana Jakšová<sup>1</sup>, Ivan Petřík<sup>4</sup>, Ondřej Novák<sup>4</sup>, František Baluška<sup>5</sup>

<sup>1</sup> *Department of Biophysics, Centre of the Region Haná for Biotechnological and Agricultural Research, Faculty of Science, Palacký University, Šlechtitelů 27, CZ-783 71, Olomouc, Czech Republic*

<sup>2</sup> *Department of Plant Physiology, Faculty of Natural Sciences, Comenius University in Bratislava, Ilkovičova 6, Mlynská dolina B2, SK-842 15, Bratislava, Slovakia*

<sup>3</sup> *Comenius University Science Park, Comenius University in Bratislava, Ilkovičova 8, SK-841 04, Bratislava, Slovakia*

<sup>4</sup> *Laboratory of Growth Regulators, Centre of the Region Haná for Biotechnological and Agricultural Research, Institute of Experimental Botany CAS and Faculty of Science, Palacký University, Šlechtitelů 27, CZ-783 71, Olomouc, Czech Republic*

<sup>5</sup> *IZMB, University of Bonn, Kirschallee 1, 53115 Bonn, Germany*

\*- author for correspondence: [andrej.pavlovic@upol.cz](mailto:andrej.pavlovic@upol.cz), +420 585 634 831

**Running title: Anaesthetic impairs jasmonate signalling in carnivorous plant**

**Highlight:** Carnivorous plant Venus flytrap (*Dionaea muscipula*) is unresponsive to insect prey or herbivore attack due to impaired electrical and jasmonate signalling under general anaesthesia induced by diethyl ether.

**Number of figures:** 5 (all colour online), (Fig. 1 colour in print)

**Word count:** 6160

**Supplementary data:** Figures: 5

Tables: 1

Videos: 6

## 27 **Summary**

28 General anaesthetics are compounds that induce loss of responsiveness to environmental  
29 stimuli in animals and humans. The primary site of general anaesthetic action is the nervous  
30 system, where anaesthetics inhibit neuronal transmission. Although plants do not have  
31 neurons, they generate electrical signals in response to biotic and abiotic stresses. Here, we  
32 investigated the effect of the general volatile anaesthetic diethyl ether on the ability to sense  
33 potential prey or herbivore attacks in the carnivorous plant Venus flytrap (*Dionaea*  
34 *muscipula*). We monitored trap movement, electrical signalling, phytohormone accumulation  
35 and gene expression in response to the mechanical stimulation of trigger hairs and wounding  
36 under diethyl ether treatment. Diethyl ether completely inhibited the generation of action  
37 potentials and trap closing reactions, which were easily and rapidly restored when the  
38 anaesthetic was removed. Diethyl ether also inhibited the later response: jasmonate (JA)  
39 accumulation and expression of JA-responsive genes. However, external application of JA  
40 bypassed the inhibited action potentials and restored gene expression under diethyl ether  
41 anaesthesia, indicating that downstream reactions from JA are not inhibited. Thus, the Venus  
42 flytrap cannot sense prey or a herbivore attack under diethyl ether treatment. This is an  
43 intriguing parallel to the effect of anaesthesia on animals and humans.

44 **Key words:** anaesthesia, anaesthetic, action potential, carnivorous plant, *Dionaea muscipula*,  
45 diethyl ether, electrical signal, jasmonic acid, plant movement, Venus flytrap.

46

47

48

49

50

51

52

53

54

## 55 Introduction

56 The carnivorous plant Venus flytrap (*Dionaea muscipula*) has evolved modified leaves called  
57 traps for prey capture (Gibson *et al.*, 2009). The trap consists of two lobes that rapidly close in  
58 response to a mechanical stimulus delivered to the trigger hairs protruding from the trap  
59 epidermis. Two touches of a trigger hair by an insect prey within 20 seconds generate 2 action  
60 potentials (APs) that snap the trap in a fraction of second at room temperature (Escalante-  
61 Pérez *et al.*, 2011; Volkov, 2019). After rapid closure secures the insect prey, the struggling of  
62 the entrapped prey in the closed trap results in the generation of further APs that cease to  
63 occur when the prey stops moving (Affolter and Olivo, 1975; Libiaková *et al.*, 2014). Third,  
64 touch and APs increase cytosolic Ca<sup>2+</sup> levels in digestive glands, which decay if no further  
65 APs are triggered (Escalante-Pérez *et al.*, 2011; Hedrich and Neher, 2018). Prey struggling,  
66 repeated mechanical stimulation and the generation of hundreds of APs result in the  
67 accumulation of phytohormones from the jasmonate group (Escalanté-Pérez *et al.*, 2011;  
68 Libiaková *et al.*, 2014; Pavlovič *et al.*, 2017). The binding of the isoleucine conjugate of  
69 jasmonic acid (JA-Ile) to the CORONATINE INSENSITIVE1 (COI1) protein as part of a  
70 coreceptor complex mediates the ubiquitin-dependent degradation of JASMONATE ZIM-  
71 DOMAIN (JAZ) repressors, resulting in the activation of jasmonate-dependent gene  
72 expression (Staswick and Tiryaki 2004; Chini *et al.*, 2007; Thines *et al.*, 2007; Sheard *et al.*,  
73 2010). Transcriptional activation leads to the synthesis of transport proteins and digestive  
74 enzymes that are secreted into the closed trap cavity (Scherzer *et al.*, 2013; 2015; 2017;  
75 Libiaková *et al.*, 2014; Böhm *et al.*, 2016a,b). After the prey movement is stopped by  
76 exhaustion or death, chemical stimuli from the prey (e.g., chitin, ammonia) enhance the  
77 synthesis of digestive enzymes through jasmonate signalling (Libiaková *et al.*, 2014; Paszota  
78 *et al.*, 2014; Bemm *et al.*, 2016).

79 Several lines of evidence indicate that the generation of electrical signals, jasmonate  
80 accumulation and expression of genes encoding digestive enzymes are tightly coupled in the  
81 Venus flytrap. First, repeated mechanical stimulation of trigger hairs is sufficient to induce  
82 accumulation of the well-known bioactive compound JA-Ile within the first hour in stimulated  
83 traps (Pavlovič *et al.*, 2017). Just two APs are necessary to induce transcription of *JAZ1*  
84 within four hours, and after five APs, *JAZ1* transcripts accumulated to the highest level. More  
85 than three APs are necessary to induce significant gene expression of digestive enzymes (e.g.,  
86 dionain and type I chitinase), and the magnitude of expression is dependent on the number of  
87 APs triggered. Gene expression can also be triggered by exogenous application of jasmonic

88 acid (JA), JA-Ile or coronatine without any mechanical stimulus. In contrast, application of  
89 the JA perception antagonist coronatine-O-methylloxime (COR-MO), which prevents the  
90 COI1-JAZ interaction, blocked gene expression despite triggering 60 APs (Böhm *et al.*,  
91 2016a; Bemm *et al.*, 2016).

92 Thus, the sequence of signalling events in Venus flytrap resembles the well-known  
93 signalling pathway in response to wounding or herbivore attack in ordinary plants (Maffei *et*  
94 *al.*, 2007), supporting the hypothesis that botanical carnivory has evolved from plant-defence  
95 mechanisms (Pavlovič and Saganová 2015; Bemm *et al.*, 2016). Changes in plasma  
96 membrane potential followed by fast electrical signals that may travel through the entire plant  
97 from the point of origin are amongst the earliest cellular responses to biotic and abiotic  
98 stresses in plants (i.e., wounding or herbivore attack, Maffei *et al.*, 2007). A breakthrough  
99 study for this issue was that by Wildon *et al.* (1992), who for the first time showed the link  
100 between electrical signal propagation and biochemical response in tomato plants. Electrical  
101 signals are often followed by changes in intracellular  $\text{Ca}^{2+}$  concentration and generation of  
102 reactive oxygen species (e.g.,  $\text{H}_2\text{O}_2$ , Maffei *et al.*, 2007; Kiep *et al.*, 2015; Nguyen *et al.*,  
103 2018). A direct link between increased cytosolic  $\text{Ca}^{2+}$  and activation of JA biosynthesis genes  
104 by  $\text{Ca}^{2+}$ /calmodulin-dependent phosphorylation of the JIV repressor complex was recently  
105 provided by Yan *et al.* (2018). As a result, increased levels of jasmonates (JA-Ile particularly)  
106 trigger the expression of JA-responsive pathogenesis (PR)-related proteins through a COI1-  
107 JAZ-dependent pathway (De Geyter *et al.*, 2012). Recently, we showed that carnivorous  
108 plants are not able to distinguish between mechanical stimulation and wounding because these  
109 processes share the same signalling pathway with plant defence mechanisms. Both induce  
110 electrical signals, jasmonate accumulation and digestive enzyme synthesis, confirming the  
111 link among electrical signal propagation, jasmonate accumulation and the expression of  
112 digestive enzymes (Krausko *et al.*, 2017; Pavlovič *et al.*, 2017). Moreover, the secreted  
113 enzymes predominantly belong to pathogenesis-related proteins (PR-proteins), indicating that  
114 carnivorous plants have exploited their hydrolytic properties, further emphasizing the  
115 similarity between botanical carnivory and plant defence mechanisms (Hatano and Hamada,  
116 2008; 2012; Schulze *et al.*, 2012).

117 Recently, we documented that Venus flytraps, sundew traps, *Mimosa* leaves and pea  
118 tendrils lost both autonomous and touch-induced movements after exposure to local and  
119 general anaesthetics. Anaesthetics also impeded seed germination and chlorophyll  
120 accumulation in cress seedlings, indicating that plants under anaesthesia lose responsiveness

121 to environmental stimuli (Yokawa *et al.*, 2018; 2019). General anaesthetics (e.g., diethyl  
122 ether) are often defined as compounds that induce a reversible loss of consciousness in  
123 humans or loss of righting reflex in animals. Anaesthesia can also be defined as loss of  
124 responsiveness to environmental stimuli. Clinical definitions are extended to include the lack  
125 of awareness to painful stimuli, which is sufficient to facilitate surgical applications in clinical  
126 and veterinary practice (Franks, 2008). The primary site of general anaesthetic action in  
127 animals and humans is the central nervous system, where these molecules enhance inhibitory  
128 neurotransmission or inhibit excitatory neurotransmission (Zhou *et al.*, 2012). Although plants  
129 do not have neurons and lack a central nervous system, they are able to generate electrical  
130 signals (Fromm and Lautner, 2007; Hedrich *et al.*, 2016). Claude Bernard (1878) concluded  
131 that volatile anaesthetics not only act on neurons but also affect physiological processes in all  
132 cells, and different cells have different susceptibilities to volatile anaesthetics, the neurons  
133 being the most sensitive (Grémiaux *et al.*, 2014). The electrical signals in plants not only  
134 trigger rapid leaf movements in ‘sensitive’ plants, such as *Mimosa pudica* or *D. muscipula*,  
135 but also induce physiological processes in ordinary plants (Fromm and Lautner, 2007;  
136 Mousavi *et al.*, 2013). Interestingly, our recent study showed that inhibition of rapid trap  
137 closure in Venus flytrap by the general anaesthetic diethyl ether is caused by inhibition of  
138 electrical signalling. There were no toxic impacts of the anaesthetics used, and the effects  
139 were fully and rapidly reversible after their removal.

140 Although carnivorous plants still do not belong to the model group of plants, the  
141 signalling events described above indicate that Venus flytrap is a suitable model for studying  
142 inducibility and plant responses to external stimuli under anaesthesia due to its rapid trap  
143 movement. Considering the tight coupling between electrical signal propagation and  
144 jasmonate signalling in carnivorous plants (Böhm *et al.*, 2016a; Bemm *et al.*, 2016; Krausko  
145 *et al.*, 2017), we hypothesize that anaesthesia can impair not only rapid trap movement  
146 triggered by APs but also the cascade of jasmonate signalling events leading to activation of  
147 the digestive process. Our study showed that the Venus flytrap cannot sense potential insect  
148 prey or a herbivore attack under anaesthesia due to blocked jasmonate signalling.

## 149 **Materials and Methods**

### 150 *Plant material and culture conditions*

151 The Venus flytrap (*D. muscipula* Ellis.) is native to the subtropical wetlands of North and  
152 South Carolina on the East Coast of the USA. Experimental plants were grown under standard

153 glasshouse conditions at the Department of Biophysics of Palacký University in Olomouc  
154 (Czech Republic) and the Department of Plant Physiology of Comenius University in  
155 Bratislava (Slovakia). Well-drained peat moss in plastic pots placed in a tray filled with  
156 distilled water to a depth of 1–2 cm was used as a substrate. Daily temperatures fluctuated  
157 between 20 and 35°C; relative air humidity ranged from 50% to 100%; and the maximum  
158 daily irradiance reached 1500  $\mu\text{mol m}^{-2} \text{s}^{-1}$  photosynthetically active radiation (PAR).

159  
160 *Experimental setup*

161 The Venus flytrap plants were incubated in 15% diethyl ether for 2 h in a polypropylene bag.  
162 This was sufficient to anaesthetize the plants, as we found in our previous study, and the  
163 plants did not react to mechanical stimulation by rapid trap closure (Yokawa *et al.*, 2018).  
164 Thereafter, one group of plants served as a nonstimulated control, and the second group was  
165 mechanically stimulated or wounded. For this, a small opening in the polypropylene bag was  
166 made. For mechanostimulation, the trigger hairs were mechanically stimulated twice within a  
167 short period of time and then 40 times with the tip of a pipette (which had been melted by  
168 heat and then hardened at room temperature to avoid a wound response by the sharp tip) every  
169 3 min for 2 h (see Pavlovič *et al.*, 2017). In the second experiment, a trap was  
170 pierced/wounded with a needle twice within a short period of time and then 40 times every 3  
171 min. In one of the experiments, extracellular measurements of electrical signals were  
172 performed on a separate group of plants during stimulation (see below). After 2 hours of  
173 stimulation, the plants were removed from the bag to allow the plants to recover from  
174 anaesthesia. Immediately, the traps from other groups of plants were sampled for  
175 phytohormone analysis. Ten hours later, the traps from the third group of plants were sampled  
176 for qPCR. At the same time, the nonstimulated traps under diethyl ether for 4 hours were also  
177 harvested. Control plants, bagged nonstimulated plants or identically stimulated plants but in  
178 the absence of diethyl ether were also harvested for phytohormone analysis and qPCR at the  
179 same time points. For each method, different groups of plants were used because wounding  
180 during sampling could activate the jasmonate signalling pathway.

181  
182 *Extracellular measurements of electrical signals*

183 Venus flytrap incubated in diethyl ether for 2 - 4 h in a polypropylene bag with attached  
184 electrodes inside was mechanically stimulated or wounded as described above. Mechanical  
185 stimulation or wounding was performed through a small opening in the bag. For recovery, the  
186 bag was cut off, and the trigger hair was touched repeatedly every 100 s. Control traps

187 without anaesthetics were also measured. The action potentials were measured on the trap  
188 surface inside a Faraday cage with non-polarizable Ag–AgCl surface electrodes (Scanlab  
189 Systems, Prague, Czech Republic) fixed with a plastic clip and moistened with a drop of  
190 conductive EV gel (Hellada, Prague, Czech Republic) commonly used in electrocardiography.  
191 The reference electrode was taped to the side of the plastic pot containing the plant submerged  
192 in 1–2 cm of water in a dish beneath the pot. The electrodes were connected to an amplifier  
193 [gain 1–1000, noise 2–3  $\mu\text{V}$ , bandwidth (–3 dB)  $10^5$  Hz, response time 10  $\mu\text{s}$ , input  
194 impedance  $10^{12}$   $\Omega$ ]. The signals from the amplifier were transferred to an analogue–digital PC  
195 data converter (eight analogue inputs, 12-bit converter,  $\pm 10$  V, PCA-7228AL, supplied by  
196 TEDIA, Plzeň, Czech Republic), collected every 6 ms (Hlaváčková *et al.*, 2006; Ilík *et al.*,  
197 2010).

198

### 199 *Quantification of phytohormone tissue level*

200 Two hours after initiation of mechanical stimulation and wounding under anaesthesia (4 hours  
201 etherized), trap tissue samples were collected. Control traps without any stimuli under  
202 anaesthesia, as well as control traps stimulated (positive control) and non-stimulated (negative  
203 control) without anaesthesia were also harvested. The traps were cut off with scissors and  
204 immediately (within 10 seconds) frozen in liquid nitrogen and stored at  $-80^\circ\text{C}$  until analysis.  
205 Ten minutes after diethyl ether removal the remaining traps on plants were mechanically  
206 stimulated to be sure that plants were only anaesthetized and not dead (the traps had to close).  
207 Quantification of JA, JA-Ile, JA-valine (Ja-Val), *cis*-12-oxo-phytodienoic acid (*cis*-OPDA),  
208 9,10-dihydrojasmonic acid (9,10-DHJA), abscisic acid (ABA), salicylic acid (SA), indole-3-  
209 acetic acid (IAA) was performed according to the method described by Floková *et al.* (2014).  
210 Briefly, frozen plant material (20 mg) was homogenized and extracted using 1 mL of ice cold  
211 10% MeOH/H<sub>2</sub>O (v/v). A cocktail of stable isotope-labelled standards was added as follows:  
212 5 pmol of [<sup>13</sup>C<sub>6</sub>]IAA, 10 pmol of [<sup>2</sup>H<sub>6</sub>]JA, [<sup>2</sup>H<sub>2</sub>]JA-Ile, and [<sup>2</sup>H<sub>6</sub>]ABA, 20 pmol of [<sup>2</sup>H<sub>4</sub>]SA  
213 and [<sup>2</sup>H<sub>5</sub>]OPDA (all from Olchemim Ltd, Czech Republic) per sample to validate the LC-  
214 MS/MS method. The extracts were purified using Oasis<sup>®</sup> HLB columns (30 mg/1 ml, Waters)  
215 and hormones were eluted with 80% MeOH. Eluent was evaporated to dryness under a stream  
216 of nitrogen. Phytohormone levels were determined by ultra-high performance liquid  
217 chromatography-electrospray tandem mass spectrometry (UHPLC-MS/MS) using an Acquity  
218 UPLC<sup>®</sup> I-Class System (Waters, Milford, MA, USA) equipped with an Acquity UPLC CSH<sup>®</sup>  
219 C<sub>18</sub> column (100 x 2.1 mm; 1.7  $\mu\text{m}$ ; Waters) coupled to a triple quadrupole mass spectrometer

220 Xevo™ TQ-S MS (Waters MS Technologies, Manchester, UK). Two independent technical  
221 measurements were performed on four biological replicates.

222

### 223 *Real-time polymerase chain reaction (qPCR)*

224 To study the induction of gene expression in the trap tissue, two corresponding genes of well-  
225 characterized proteins from digestive fluid were chosen: the cysteine protease dionain  
226 (Schulze *et al.*, 2012; Risør *et al.* 2016) and chitinase I (Paszota *et al.*, 2014). To determine  
227 the effect of anaesthesia on gene expression, we had to find the time point where the  
228 induction of gene expression is high. Therefore, we first collected 100 mg of trap tissue from  
229 plants after 0, 2, 6, 12, 24, and 48 hours from initiation of mechanical stimulation, wounding  
230 or external application of 2 mM jasmonic acid (JA) under a normal atmosphere (air).

231 Based on this experiment, we chose the 12-hour time point for mechanostimulation  
232 and wounding under anaesthesia. First, the plants were enclosed for 2 hours in polypropylene  
233 bags with diethyl ether and then repeatedly mechanically stimulated for 2 hours or wounded  
234 as described above. After 4 hours of anaesthesia, the plants were removed from the bag. Ten  
235 hours later, 100 mg of trap tissue sample was harvested (Fig. S1A). Control plants without  
236 anaesthesia in the air were also mechanically stimulated or wounded (positive controls) or  
237 were without any stimulation (in the air and under diethyl ether, negative controls).

238 To determine the effect of JA under diethyl ether treatment, the plants were again  
239 enclosed in polypropylene bags with diethyl ether for 2 hours. We applied 2 mM JA to the  
240 trap surface (volume dependent on the size of the trap), and the second group of plants had no  
241 JA application but was still under a diethyl ether atmosphere. The same was done in the  
242 control air-only plants. After 7 hours, trap samples were collected for qPCR analyses (Fig.  
243 S1B). The sampling time was shorter than in the previous experiment because prolonged  
244 exposure of plants to diethyl ether caused damage to trap tissue.

245 To exclude the lethal impact of diethyl ether on plants, the recovery of gene  
246 expression was also investigated. After 2 hours in diethyl ether, the plants were removed from  
247 the bag and kept for 2 hours in the air. Then, the plants were mechanically stimulated or  
248 wounded as described above, and after 10 hours, trap samples were collected for qPCR  
249 analyses (Fig. S5A).



250 Samples were stored at  $-80^{\circ}\text{C}$  before gene expression analyses. Total RNA was  
251 extracted using a Spectrum Plant Total RNA kit (Sigma–Aldrich, USA), and DNase I was  
252 added and purified using an RNA Clean & Concentrator kit (Zymoresearch, USA) according  
253 to the manufacturer’s instructions. The RNA integrity was assessed by agarose (1%) gel  
254 electrophoresis. The concentration and sample purity were measured by a NanoDrop™ 1000  
255 spectrophotometer (Thermo Fisher Scientific, Germany). The synthesis of the first strand of  
256 cDNA was performed by an ImProm-II Reverse Transcription System (Promega) using  
257 Oligo(dT)15 primers according to the manufacturer’s protocol. The primers (Tab. S1) for  
258 *dionain*, *chitinase I* and the reference gene *actin* were designated by the Primer3plus tool  
259 ([http://primer3plus.com/web\\_3.0.0/primer3web\\_input.htm](http://primer3plus.com/web_3.0.0/primer3web_input.htm)). Gradient PCR was used to  
260 determine the annealing temperature ( $T_a$ ) of the primers (Tab. S1). Each amplified product  
261 was assessed by agarose (2%) gel electrophoresis and subsequently sequenced by the Sanger  
262 method to verify product specificity. The stability of the reference genes was evaluated by the  
263  $2^{-\Delta\text{CT}}$  method (Livak and Schmittgen, 2001) and the BestKeeper tool ([http://www.gene-](http://www.gene-quantification.info/)  
264 [quantification.info/](http://www.gene-quantification.info/)). Actin represented a suitable reference gene that was not affected by the  
265 different treatments (data not shown). For real-time PCR, specific gene sequences were  
266 amplified by Maxima SYBR Green/ROX qPCR Master Mix (Thermo Fisher Scientific). Real-  
267 time PCR reactions were performed in 96-well plates on a Light Cycler II 480 (Roche)  
268 device, and the relative changes in gene expression were estimated according to Pfaffl (2001).  
269 All samples for PCR experiments were analysed in four biological and three technical  
270 replicates.

### 271 *Western blotting*

272 To detect and quantify cysteine protease (*dionain*) and type I chitinase, polyclonal antibodies  
273 against these proteins were raised in rabbits by Agrisera (Vännäs, Sweden) and Genscript  
274 (Piscataway, NJ, USA). The following amino acid sequences (epitopes) were synthesized:  
275 cysteine protease, (NH<sub>2</sub>-) CAFQYVVNNQGIDTE (-CONH<sub>2</sub>) (Agrisera, Vännäs, Sweden),  
276 and chitinase I, (NH<sub>2</sub>-) CTSHETTGGWATAPD (-CONH<sub>2</sub>) (Genscript, Piscataway, NJ,  
277 USA), as we described previously (Pavlovič *et al.*, 2017). All sequences were coupled to a  
278 carrier protein (keyhole limpet hemocyanin, KLH) and injected into two rabbits each. The  
279 terminal cysteine of the peptide was used for conjugation. The rabbit serum was analysed for  
280 the presence of antigen-specific antibodies using an ELISA.

281 The digestive fluid was collected 48 hours after the beginning of mechanical  
282 stimulation and wounding from plants in the air (no digestive fluid was secreted under diethyl  
283 ether). The samples were heated and denatured for 30 min at 70°C and mixed with modified  
284 Laemmli sample buffer to a final concentration of 50 mM Tris-HCl (pH 6.8), 2% SDS, 10%  
285 glycerol, 1%  $\beta$ -mercaptoethanol, 12.5 mM EDTA, and 0.02% bromophenol blue. The same  
286 volume of digestive fluid was electrophoresed in 10% (v/v) SDS polyacrylamide gel  
287 (Schägger, 2006). The proteins in the gels were either visualized by silver staining  
288 (ProteoSilver; Sigma Aldrich) or transferred from the gel to a nitrocellulose membrane (Bio-  
289 Rad) using a Trans-Blot SD Semi-Dry Electrophoretic Transfer Cell (Bio-Rad). After  
290 blocking in TBS-T containing 5% BSA overnight, the membranes were incubated with the  
291 primary antibody for 1 h at room temperature, and after washing, the membrane was  
292 incubated with the secondary antibody: the goat antirabbit IgG (H + L)-horseradish  
293 peroxidase conjugate (Bio-Rad). Blots were visualized by an Amersham Imager 600 gel  
294 scanner (GE HealthCare Life Sciences, Tokyo, Japan).

#### 295 *Statistical analyses*

296 All data are from biological replicates, and each biological sample was analysed in two or  
297 three technical replicates. Significant differences between treatments were evaluated by two-  
298 tailed Student's *t*-test (Microsoft Excel).

## 299 **Results**

### 300 *Anaesthesia inhibits electrical signalling and trap closing reactions*

301 The trap of the Venus flytrap plant generates typical APs in response to mechanical  
302 stimulation of trigger hair or wounding. Two APs resulted in rapid trap closure within a  
303 second (Fig. 1A, Video S1, S4). The shape, duration and amplitude of APs triggered by  
304 mechanostimulation and wounding were the same (Fig. S2). However, after 2 hours under  
305 diethyl ether anaesthesia, the trap lost the closing response and the ability to generate APs in  
306 response to both stimuli (Fig. 1B, Video S2, S5). One hundred seconds after removal of  
307 diethyl ether, APs with a reduced amplitude and increased half-width were detected (Fig. 2A),  
308 but they were not able to trigger trap closure. In some traps, the first AP was detected after  
309 200 s during recovery. The amplitude and spike half-width of the recorded APs gradually  
310 recovered (recorded every 100 s, Fig. 2B, C). When the amplitude of APs was lower and the  
311 spike half-width longer during recovery, more touches, and thus more APs, were necessary to

312 induce rapid trap closure. The closing response of the trap was fully restored within 10 - 15  
313 minutes, and again, only two touches were sufficient for trap closure after recovery (Video  
314 S3, S6).

### 315 *Anaesthesia inhibits the accumulation of jasmonates*

316 In our previous study, we found that the jasmonate tissue level in Venus flytrap was the  
317 highest within the first two hours of stimulation (Pavlovič *et al.*, 2017). Therefore, we chose  
318 this time point for phytohormone analysis under anaesthesia. We found a clear activation of  
319 the JA signalling pathway for both mechanostimulation and wounding, consistent with our  
320 previous study (Pavlovič *et al.*, 2017). There was more than a 300-fold increase in the JA  
321 tissue level for both types of stimulation in the air (Fig. 3A, I). The bioactive compound JA-  
322 Ile increased 23- and 13-fold in response to mechanostimulation and wounding, respectively  
323 (Fig. 3B, J). JA-Val significantly increased only in response to wounding (Fig. 3C, K), and  
324 the content of *cis*-OPDA did not change significantly (Fig. 3D, L). Under anaesthesia, diethyl  
325 ether completely inhibited jasmonate accumulation in response to mechanostimulation (Fig.  
326 3A-E). In response to wounding, there was only a slight but significant increase of  
327 jasmonates. The JA level increased 7-fold, and the bioactive JA-Ile level increased 1,5-fold  
328 (Fig. 3I, J). This increase probably did not reach the threshold level for activation of the JA  
329 signalling pathway, as indicated by the qPCR data (see below). The levels of other plant  
330 hormones (ABA, IAA) did not change significantly (Fig. 3F, H, N, P). There was a trend  
331 towards a 2-fold increase in SA level in response to both stimuli, irrespective of treatment (air  
332 vs. diethyl ether Fig. 3G, O).

### 333 *Transcription of jasmonic acid-responsive genes is inhibited under anaesthesia.*

334 First, we analysed the time dependence of the mRNA levels of two selected JA-responsive  
335 genes in Venus flytrap: the cysteine protease *dionain* and *chitinase I* (Böhm *et al.*, 2016;  
336 Bemm *et al.*, 2016a). The kinetics of the upregulation of mRNA levels for both genes were  
337 similar. The highest mRNA level was found between 12 and 24 hours after the first AP was  
338 triggered for both types of stimulation. At 48 hours, the mRNA levels declined. The kinetics  
339 of mRNA levels were different for the external application of JA; the mRNA levels of both  
340 genes gradually increased over 48 hours (Fig. S3A, B). The protein product of these genes  
341 was detected in digestive fluid after 48 hours (Fig. S4). Based on these results, we chose the  
342 shortest possible time point, where the upregulation of gene expression was evident, to  
343 investigate the effect of anaesthesia. In this experiment, plants were exposed to diethyl ether

344 for two hours, and the traps were mechanostimulated or wounded for the next two hours. The  
345 diethyl ether was removed, and the traps were sampled 10 hours later (12 hours after the first  
346 mechanostimulus, Fig. S1A). Fig. 4 clearly shows that the mRNA levels of both investigated  
347 genes (*dionain*, *chitinase I*) were not increased under anaesthesia and were comparable with  
348 the nonstimulated control in the air or diethyl ether. Two hours after removing diethyl ether,  
349 the Venus flytrap was again able to upregulate gene expression in response to  
350 mechanostimulation and wounding (Fig. S5B, C).

351 *External application of jasmonic acid bypassed electrical signalling and restored gene*  
352 *expression under anaesthesia.*

353 To determine whether we can bypass the inhibition of electrical signalling by direct  
354 application of JA and thus restore gene expression under anaesthesia, we performed the  
355 following experiment. The plants were exposed to diethyl ether for two hours. Then, a few  
356 drops of 2 mM JA were applied on the trap surface, and the plants were kept for seven hours  
357 under anaesthesia, which was the longest possible time to avoid tissue damage. Then, the  
358 traps were sampled for qPCR (Fig. S1B). Fig. 5B shows that JA clearly restored the  
359 expression of *chitinase I* under diethyl ether. *Dionain* showed a rather weak nonsignificant  
360 response (Fig. 5A); however, at the six-hour time point, the increase was not statistically  
361 significant in the experiment depicted in Fig. S3A. This result is consistent with the finding  
362 that *chitinase I* expression increased earlier (somewhere between 2-6 hours) than *dionain*  
363 (between 6-12 hours, Fig. S3) in response to mechanical stimulation, wounding and JA  
364 application.

## 365 **Discussion**

366 In this study, we showed that during diethyl ether treatment, Venus flytrap could not sense its  
367 environment, and after “waking up”, it did not “remember” what occurred. This was shown  
368 by inhibition of APs and trap movement, inability to accumulate jasmonates and no induction  
369 of genes encoding digestive enzymes and thus no physiological response. Our observations  
370 resemble those in animals and humans where general anaesthesia suppresses central nervous  
371 system activity. The volatile anaesthetic halothane (halogenated derivate of ether) produced a  
372 concentration-dependent depression of AP amplitude accompanied by an increased spike half-  
373 width with complete inhibition at 3 vol % in mammalian nociceptors (MacIver and Tanelian,  
374 1990). Electrical signalling in Venus flytrap was fully recovered in the range of minutes; a  
375 similar recovery period was recorded in mammal neurons (MacIver and Tanelian, 1990).

376 During this period, more than two touches were necessary to induce rapid trap closure,  
377 supporting the summation of smaller subthreshold charges of APs necessary for trap closing  
378 reactions, consistent with electrical memory in Venus flytrap (Volkov *et al.*, 2008; 2009).  
379 Several previous works indicate that shy plants (*M. pudica*) are also sensitive to anaesthesia.  
380 The leaf closing reaction after mechanical stimulus was inhibited by exposure to diethyl ether,  
381 halothane and lidocaine but not ketamine (Milne and Beamish, 1999; De Luccia, 2012;  
382 Yokawa *et al.*, 2018). Although electrical signals were not recorded in these studies, it is  
383 tempting to assume that they also inhibited their generation, as electrical signalling and rapid  
384 plant movements are tightly coupled (Fromm and Lautner, 2007).

385 Extensive work has been performed to reveal receptors or mechanisms of anaesthetic  
386 action, and two hypotheses have been proposed: the lipid (membrane) theory and protein  
387 (receptor) theory (Rinaldi, 2014; Franks, 2008), with several modifications (Lerner *et al.*,  
388 1997; Tang and Xu, 2002). Meyer (1899) and Overton (1901) discovered the correlation  
389 between the physical properties of general anaesthetic molecules and their potency: the  
390 greater the lipid solubility of the compound in olive oil, the greater its anaesthetic potency is.  
391 They concluded that solubilization of lipophilic general anaesthetic in the lipid bilayer of the  
392 neuron causes its malfunction and anaesthetic effect. Although this simple idea could explain  
393 why almost all cells can be anaesthetized, there is also evidence that anaesthetics act by  
394 binding directly to sensitive target proteins/receptors. Franks and Lieb (1984) demonstrated  
395 that the relationship reported by Meyer (1899) and Overton (1901) could be reproduced using  
396 a soluble protein. They showed that a range of general anaesthetics acted as competitive  
397 antagonists of the protein firefly luciferase. Remarkably, the inhibition of luciferase was  
398 directly correlated with anaesthetic potency, providing persuasive evidence that general  
399 anaesthetic drugs could selectively interact with proteins (Weir *et al.*, 2006). Until now, many  
400 proteins have been shown to contribute to general anaesthesia. Among them are  $\gamma$ -  
401 aminobutyric acid type A receptor (GABA<sub>A</sub>), glutamate gated N-methyl-D-aspartate  
402 (NMDA) receptors, potassium and sodium channels and others (Mihic *et al.*, 1997; Orser *et*  
403 *al.*, 2002; Weir, 2006; Zhou *et al.*, 2012; Herold and Hemmings, 2012.). Diethyl ether was  
404 shown to interact with GABA<sub>A</sub>, NMDA receptors and the potassium channel TREK-1 in  
405 animals (Martin *et al.*, 1995; Patel *et al.*, 1999; Krasowski and Harrison, 2000; Zhou *et al.*,  
406 2012). However, the exact nature of general anaesthetic-protein interactions remains a  
407 mystery. Anaesthetics may bind to the preformed cavities on proteins by fitting into  
408 structurally compatible pockets (key-lock mechanism), causing structural perturbation to the

409 protein channel. Volatile general anaesthetics may have not changed the structure of the  
410 membrane channel by a key-lock mechanism but by changing its dynamics by becoming an  
411 integral part of amphipathic domains where they can either disrupt the association of the  
412 channel with its surroundings or facilitate the formation of structured water clusters within the  
413 protein (Tang and Xu, 2002). Another proposed explanation is a combination of the lipid and  
414 protein hypotheses: anaesthetics alter the cell membrane properties and may distort the  
415 channel protein to block channel function (Lerner *et al.*, 1997, Andersen and Koeppe, 2007).

416 Surprisingly, similar proteins that are suspected as possible targets of volatile  
417 anaesthetic diethyl ether in animals and humans have also been discovered in plants, where  
418 they are also responsible for electrical signalling. First, glutamate receptor-like proteins  
419 (GLRs) in plants are the most closely related proteins to NMDA channels in mammals. They  
420 even share similar extensive sequence identity and secondary structure (Lam *et al.*, 1998;  
421 Weiland *et al.*, 2016). GLR3.3 and GLR3.6 are  $\text{Ca}^{2+}$  channels that mediate the propagation of  
422 wound-induced electrical and  $\text{Ca}^{2+}$  signals in *Arabidopsis* from damaged to undamaged leaves  
423 (Mousavi *et al.*, 2013; Salvador-Recatalà *et al.*, 2014; Hedrich *et al.*, 2016; Toyota *et al.*,  
424 2018). Moreover, glutamate, which acts as an excitatory neurotransmitter in the vertebrate  
425 central nervous system, accumulates in response to wounding in *Arabidopsis*, and GLRs act  
426 as sensors that convert the wound signal into an electrical signal that propagates to distant  
427 organs where defence responses are induced (Toyota *et al.*, 2018). Salvador-Recatalà *et al.*  
428 (2014) and Hedrich *et al.* (2016) extended their studies and found that APs triggered by cold  
429 water and wounding are not inhibited in local leaves of *glr3.3* and *glr3.6* double mutants.  
430 Therefore, the elicitation and propagation of APs is independent of GLR3.3 and GLR3.6 in  
431 plants, and they are only important for channelling the signal to neighbouring systemic leaves.  
432 This finding is consistent with the results of de Luccia (2012), who found that ketamine,  
433 which mediates anaesthesia by blockade of the NMDA receptor in animals, had no effect on  
434 the trap closing reaction in Venus flytrap and closing leaflets in *M. pudica*. In addition to  $\text{Ca}^{2+}$   
435 influx, which is important for the initial depolarization during AP generation, efflux of  $\text{Cl}^-$   
436 accelerates depolarization with the subsequent  $\text{K}^+$  efflux/influx needed for repolarization  
437 (Felle and Zimmermann, 2007). The anion QUAC1-type channels and AKT2/3 and  
438 SKOR/GORK-type  $\text{K}^+$  channels have been proposed to be involved in AP generation in plants  
439 (van Bel *et al.*, 2014; Hedrich *et al.*, 2016). Indeed, AKT2 modulates tissue excitability and  
440 GORK shapes APs in *Arabidopsis* (Cuin *et al.*, 2018). Diethyl ether activated another  
441 potassium channel, TREK-1, causing hyperpolarization of the membrane in mammals and

442 inhibiting excitability (Patel *et al.*, 1999; Peyronnet *et al.*, 2014). The most closely related  
443 proteins in plants are TPK potassium channels, which are known to be involved in  
444 mechanosensing and controlling membrane potential (Becker *et al.*, 2004). The third receptor  
445 that was suspected to be a target of diethyl ether anaesthesia in animals is the GABA<sub>A</sub>  
446 receptor. GABA is the main inhibitory neurotransmitter in the central nervous system of  
447 vertebrates and exerts its inhibitory effect by activating Cl<sup>-</sup> currents through the GABA<sub>A</sub>  
448 receptor, hyperpolarizing the membrane and inhibiting excitability. GABA<sub>A</sub> receptor function  
449 is allosterically enhanced by diethyl ether and its halogenated derivatives (Krasowski and  
450 Harrison, 2000). Decades ago, GABA was shown to rapidly accumulate in plant tissue in  
451 response to different biotic and abiotic stresses, but its receptor was unknown. Recently, the  
452 first GABA receptor was found in plants and identified as aluminium-activated malate  
453 transporter (ALMT, Ramesh *et al.*, 2015; Žárský, 2015). Activation of ALMT results in  
454 depolarization of the membrane, and inversely, GABA inhibition results in hyperpolarization  
455 of the membrane potentials, generating a state of low excitability (Žárský, 2015). Although  
456 the outcome is surprisingly similar to the effect of GABA on animal neurons, there is no  
457 sequence homology to the GABA<sub>A</sub> receptor except for the small region responsible for the  
458 GABA interaction (Ramesh *et al.*, 2015). This finding decreases the probability that diethyl  
459 ether may have the same effect on two unrelated proteins, even if it is only a positive  
460 allosteric modulator. As we lack exact data that would allow us to identify the molecular  
461 bases underlying the initiation and propagation of APs in plants, it is impossible to identify  
462 the protein target of anaesthetic on electrical signals in plants. Either other molecules  
463 represent targets of diethyl ether in plants or the membrane theories proposed by Meyer  
464 (1899), Overton (1901), and Lerner *et al.* (1997) are relevant in the case of plants.

465         There is an intriguing parallel to the effects of anaesthetics on animals and humans.  
466 Anaesthesia induces loss of responsiveness to environmental stimuli as well as loss of pain  
467 perception during surgical operation. Pain sensing in humans results from the action of  
468 prostaglandins on peripheral sensory neurons (nociceptors) and on central sites within the  
469 spinal cord and the brain (Funk *et al.*, 2001; Ricciotti and FitzGerald, 2011). Tissue injury  
470 triggers cyclooxygenase-2 (COX-2) in peripheral tissue to convert arachidonic acid to  
471 prostaglandin E2 (PGE2), resulting in stimulation/sensitizing of the nociceptor in peripheral  
472 nerve to send a signal for pain to the central nervous system. The oxylipin pathway leading to  
473 prostaglandin synthesis in animals is mimicked in plants by a similar pathway that leads to the  
474 synthesis of jasmonates (Pan *et al.*, 1998). We do not claim that plants feel pain, but they use

475 structurally similar molecules as warning signals. We believe that the suppression of  
476 jasmonate accumulation under anaesthesia is mediated by the inhibition of electrical  
477 signalling, which is tightly coupled to the JA response in ordinary (Mousavi *et al.*, 2013;  
478 Toyota *et al.*, 2018) and carnivorous plants (Böhm *et al.*, 2016a; Bemm *et al.*, 2016).  
479 However, the mechanism of action strongly differs between animals and plants. Whereas the  
480 production of oxylipins in plants is mainly downstream from electrical signalling, in animals,  
481 it is upstream (prostaglandins sensitize nociceptors for pain). Thus, under anaesthesia, the  
482 warning signal (prostaglandins) in animals can be synthesized but is not sensed; in plants, the  
483 warning signal (JA) is not synthesized at all. Because of this, exogenous application of JA  
484 under anaesthesia can bypass inhibited electrical signalling in plants and trigger the response  
485 (Fig. 5).

486         Wounding, cutting, burning or herbivore attack can all induce electrical signalling and  
487 jasmonate accumulation in ordinary plants (Herde *et al.*, 1996; 1999; Maffei *et al.*, 2007;  
488 Mousavi *et al.*, 2013). Several genome-wide transcript profiling studies have demonstrated  
489 that jasmonates trigger extensive transcriptional reprogramming of metabolism. Jasmonates  
490 directly mediate the crucial switch from growth to defence, enabling the plant to reallocate  
491 energy to protect itself; thus, plant defence represents a significant cost for plants. JA-induced  
492 expression of defence genes occurred concomitantly with the repression of photosynthetic  
493 genes and genes involved in cell division and expansion (Stintzi *et al.*, 2001; Świątek *et al.*,  
494 2002; Giri *et al.*, 2006; Pauwels *et al.*, 2009; Attaran *et al.*, 2014). Plants with constitutively  
495 activated JA signalling (e.g., *cev1*) exhibit stunted growth (Ellis and Turner, 2001).  
496 Additionally, plants with activated JA signalling in an herbivore-free environment have  
497 decreased seed production (Baldwin, 1998; Cipollini, 2006). In this study, we showed that we  
498 can turn off jasmonate signalling and suppress the production of warning signals and stress by  
499 anaesthesia in plants as in animals. Transplantation, wounding, cutting and grafting in  
500 horticultural practices are shocks for plants that affect their physiology and production. It is  
501 tempting to assume that doing this under anaesthesia can significantly improve plant fitness.  
502 This may explain the historical record of successful transplantation of large trees under  
503 chloroform treatment into new ground without significant damage by the famous Indian  
504 botanist Sir Jagadish Chandra Bose (Yokawa *et al.*, 2019). Similar to pain in humans during  
505 surgery, anaesthetics inhibit the production of warning signals in plants. Although wounding  
506 slightly increased JA and JA-Ile under anaesthesia in this study, this increase probably did not  
507 reach the threshold level for activation of gene expression. Because JA synthesis is controlled



508 at the level of substrate availability (Koo and Howe, 2009), this slight increase can be  
509 explained by the direct release of lipids from damaged membranes without activation of  
510 phospholipases that release JA precursors (e.g., linolenic acid) from plastid lipids (Ishiguro *et*  
511 *al.*, 2001; Hyun *et al.*, 2008). For phospholipase activation, signalling events (cytoplasmic  
512 Ca<sup>2+</sup> increase) are important (Ryu and Wang 1996; Wang *et al.*, 2000). Calcium is involved in  
513 the generation of APs in Venus flytrap, and its increased level in the cytoplasm was detected  
514 after the third AP (Hodick and Sievers 1988; Krol, 2006; Escalante-Pérez *et al.*, 2011), but  
515 APs are completely inhibited under anaesthesia. More research is needed on ordinary plants to  
516 support these findings, such as how anaesthesia affects the generation of systemic variation  
517 potentials (VPs), which are often generated in response to damaging stimuli in ordinary  
518 plants.

519 In conclusion, we showed that the carnivorous plant Venus flytrap cannot sense its  
520 environment during anaesthesia with diethyl ether. This situation resembles the effect of  
521 general anaesthesia on animals and humans, resulting in a total lack of sensation. After  
522 removing the anaesthesia, the recovery of sensitivity is very fast. We have shown that one of  
523 the many possible targets of anaesthetics is electrical signals (APs), which affect the later  
524 reactions, e.g., generation of warning signals (JA) and transcription of JA-responsive genes.  
525 Because jasmonates are important stress hormones that redirect gene expression from growth  
526 to defence, the use of anaesthesia during vegetative propagation and plant manipulation in  
527 horticultural practice may be plausible, but more experimental studies with ordinary plants are  
528 needed. The fact that anaesthesia inhibits electrical signal propagation not only in animals but  
529 also in plants and in both affects their sensibility indicates a remarkable similarity between  
530 animals and plants.

### 531 **Acknowledgements**

532 This work was supported by the Czech Science Foundation Agency [project GAČR 16-  
533 07366Y] and Internal Grant Agency of Palacký University [project IGA\_PrF\_2019\_030].  
534 This publication is also the result of the project implementation: Comenius University in  
535 Bratislava Science Park supported by the Research and Development Operational Programme  
536 funded by the ERDF [Grant number: ITMS 26240220086].

### 537 **Author contributions**

538 AP and FB designed the study; AP measured electrical signal, ML and BB performed qPCR,  
539 JJ, IP and ON did phytohormone analysis, AP wrote the manuscript and provided materials  
540 and financial support. All authors discussed the results and contributed to the manuscript.

541 **Conflict of interest:** We do not have any conflict of interest.

#### 542 **Supplementary data**

543 **Fig. S1** Timeline of experimental setup for diethyl ether treatment.

544 **Fig. S2** Comparison of action potentials triggered on the same plant by mechanostimulation  
545 (black line) and 200 seconds after by wounding (red line).

546 **Fig. S3** Timecourse of gene expression in response to mechanostimulation, wounding and  
547 external application of jasmonic acid during 48 hours in the Venus flytrap (*Dionaea*  
548 *muscipula*).

549 **Fig. S4** Protein profile and immunodetection of cysteine protease (dionain) and VF-1  
550 chitinase in the digestive fluid of the Venus flytrap (*Dionaea muscipula*).

551 **Fig. S5** Recovery of gene expression after anaesthesia in the Venus flytrap (*Dionaea*  
552 *muscipula*).

553 **Table S1** Primer sequences and properties for the Venus flytrap (*Dionaea muscipula*).

554 **Movie S1** Mechanical stimulation of trigger hairs twice results in rapid trap closure in the  
555 Venus flytrap (*Dionaea muscipula*).

556 **Movie S2** The trap remains open after repeated mechanical stimulation of trigger hairs under  
557 anaesthesia with diethyl ether in the Venus flytrap (*Dionaea muscipula*).

558 **Movie S3** 700 seconds after removing of diethyl ether the trap reaction to  
559 mechanostimulation is restored in the Venus flytrap (*Dionaea muscipula*).

560 **Movie S4** Wounding the trap by needle triggers rapid trap closure in the Venus flytrap  
561 (*Dionaea muscipula*).

562 **Movie S5** The trap remains open after wounding under anaesthesia with diethyl ether in the  
563 Venus flytrap (*Dionaea muscipula*).

564 **Movie S6** 700 seconds after removing of diethyl ether the trap reaction to wounding is  
565 restored in the Venus flytrap (*Dionaea muscipula*).

## References

- Andersen OS, Koeppe RE, 2nd.** 2007. Bilayer thickness and membrane protein function: an energetic perspective. *Annual Review of Biophysics and Biomolecular Structure* **36**, 107–130.
- Affolter JM, Olivo RF.** 1975. Action potentials in Venus's-flytraps: long term observations following the capture of prey. *American Midland Naturalist* **93**, 443–445.
- Attaran E, Major IT, Cruz JA, Rosa BA, Koo AJ, Chen J, Kramer DM, He SY, Howe GA.** 2014. Temporal dynamics of growth and photosynthesis suppression in response to jasmonate signaling. *Plant Physiology* **165**, 1302–1314.
- Baldwin IA.** 1998. Jasmonate-induced responses are costly but benefit plants under attack in native populations. *Proceedings of the National Academy of Sciences USA* **95**, 8113-8118.
- Becker D, Geiger D, Dunkel M, et al.** 2004. AtTPK4, an *Arabidopsis* tandem-pore K<sup>+</sup> channel, poised to control the pollen membrane voltage in a pH- and Ca<sup>2+</sup>-dependent manner. *Proceedings of the National Academy of Sciences USA* **101**, 15621–15626.
- van Bel AJ, Furch AC, Will T, Buxa SV, Musetti R, Hafke JB.** 2014. Spread the news: systemic dissemination and local impact of Ca<sup>2+</sup> signals along the phloem pathway. *Journal of Experimental Botany* **65**, 1761-1787.
- Bemm F, Becker D, Lariä C, et al.** 2016. Venus flytrap carnivorous lifestyle builds on herbivore defense strategies. *Genome Research* **26**, 812–825.
- Bernard C.** 1878. *Leçons sur les phénomènes de la vie communs aux animaux et aux végétaux*. (Librairie J.-B. Baillièere et Fils).
- Böhm J., Scherzer S, Krol E, et al.** 2016a. The Venus flytrap *Dionaea muscipula* counts prey-induced action potentials to induce sodium uptake. *Current Biology* **26**, 286–295.
- Böhm J, Scherzer S, Shabala S, Krol E, Neher E, Mueller TD, Hedrich R.** 2016b. Venus Flytrap HKT1-Type Channel provides for prey sodium uptake into carnivorous plant without conflicting with electrical excitability. *Molecular Plant* **9**, 428–436.
- Cipollini DF.** 2006. Consequences of the overproduction of methyl jasmonate on seed production, tolerance to defoliation and competitive effect and response of *Arabidopsis thaliana*. *New Phytologist* **173**, 146–153.
- Chini A, Fonseca S, Fernández G, et al.,** 2007. The JAZ family of repressors is the missing link in jasmonate signalling. *Nature* **448**, 666-671.
- Cuin TA, Dreyer I, Michard E.** 2018. The role of potassium channels in *Arabidopsis thaliana* long distance electrical signalling: AKT2 modulates tissue excitability while GORK shapes action potentials. *International Journal of Molecular Sciences* **19**, 926.
- De Geyter N, Gholami A, Goormachtig S, Goossens A.** 2012. Transcriptional machineries in jasmonate-elicited plant secondary metabolism. *Trends in Plant Science* **17**, 349–359.

**Ellis C, Turner JG.** 2001. The Arabidopsis mutant *cev1* has constitutively active jasmonate and ethylene signal pathways and enhanced resistance to pathogens. *Plant Cell* **13**, 1025-1033.

**Escalante-Pérez M, Krol E, Stange A, et al.** 2011. A special pair of phytohormones controls excitability, slow closure, and external stomach formation in the Venus flytrap. *Proceedings of the National Academy of Sciences USA* **108**, 15492–15497.

**Felle HH, Zimmermann MR.** 2007. Systemic signalling in barley through action potentials. *Planta* **226**, 203-214.

**Floková K, Tarkovská D, Miersch O, Strnad M, Wasternack C, Novák O.** 2014. UHPLC-MS/MS based target profiling of stress-induced phytohormones. *Phytochemistry* **105**, 147–157.

**Franks NP** 2008. General anaesthesia: from molecular targets to neuronal pathways of sleep and arousal. *Nature Reviews Neuroscience* **9**, 370–386.

**Franks NP, Lieb WR** 1984. Do general anaesthetics act by competitive binding to specific receptors? *Nature* **310**, 599–601.

**Fromm J, Lautner S.** 2007. Electrical signals and their physiological significance in plants. *Plant, Cell and Environment* **30**, 249–257.

**Funk CD.** 2001. Prostaglandins and leukotrienes: advances in eicosanoid biology. *Science* **294**, 1871–1875.

**Gibson TC, Waller DM** 2009. Evolving Darwin's 'most wonderful' plant: ecological steps to a snap-trap. *New Phytologist* **183**, 575–587.

**Giri AP, Wünsche H., Mitra S, Zavala JA, Muck A, Svatoš A, Baldwin IT.** 2006. Molecular Interactions between the specialist herbivore *Manduca sexta* (Lepidoptera, Sphingidae) and its natural host *Nicotiana attenuata*. VII. Changes in the Plant's Proteome. *Plant Physiology* **142**, 1621–1641.

**Grémiaux A, Yokawa K, Mancuso S, Baluška F.** 2014. Plant anesthesia supports similarities between animals and plants: Claude Bernard's forgotten studies. *Plant Signaling and Behavior* **9**, e27886.

**Hatano N, Hamada T.** 2008. Proteome analysis of pitcher fluid of the carnivorous plant *Nepenthes alata*. *Journal of Proteome Research* **7**, 809–816.

**Hatano N, Hamada T.** 2012. Proteomic analysis of secreted protein induced by a component of prey in pitcher fluid of the carnivorous plant *Nepenthes alata*. *Journal of Proteomics* **75**, 4844–4452.

**Hedrich R, Neher E.** 2018. Venus flytrap: How an excitable, carnivorous plant works. *Trends in Plant Science* **23**, 220–234.

**Hedrich R, Salvador-Recatalà V, Dreyer I.** 2016. Electrical wiring and long-distance plant communication. *Trends in Plant Science* **21**, 376–387.

**Herde O, Atzor R, Fisahn J, Wasternack C, Willmitzer L, Pena-Cortes H.** 1996. Localized wounding by heat initiates the accumulation of proteinase Inhibitor II in abscisic acid-deficient plants by triggering jasmonic acid biosynthesis. *Plant Physiology* **112**, 853–860.

**Herde O, Pena-Cortés H, Wasternack C, Willmitzer L, Fisahn J.** 1999. Electric signaling and Pin2 gene expression on different abiotic stimuli depend on a distinct threshold level of endogenous abscisic acid in several abscisic acid-deficient tomato mutants. *Plant Physiology* **119**, 213–218.

**Herold KF, Hemmings HC.** 2012. Sodium channels as targets for volatile anesthetics. *Frontiers in Pharmacology* **3**, article 50.

**Hlaváčková V, Krchňák V, Nauš J, Novák O, Špundová M, Strnad M.** 2006. Electrical and chemical signals involved in short-term systemic photosynthetic responses of tobacco plants to local burning. *Planta* **255**, 235–244.

**Hodick D, Sievers A.** 1988. The action potential of *Dionaea muscipula* Ellis. *Planta* **174**, 8–18.

**Hyun Y, Choi S, Hwang H-J, et al.** 2008. Cooperation and functional diversification of two closely related galactolipase genes for jasmonate biosynthesis. *Developmental Cell* **14**, 183–192.

**Ilík P, Hlaváčková V, Krchňák P, Nauš J.** 2010. A low-noise multi-channel device for the monitoring of systemic electrical signal propagation in plants. *Biologia Plantarum* **54**, 185–190.

**Ishiguro S, Kwai-Oda A, Ueda J, Nishida I, Okada K.** 2001. The DEFECTIVE IN ANOTHER DEHISCENCE1 gene encodes a novel phospholipase A1 catalyzing the initial step of jasmonic acid biosynthesis, which synchronizes pollen maturation. *The Plant Cell* **13**, 2191–2209.

**Kiep V, Vadassery J, Lattke J, Maaß JP, Boland W, Peiter E, Mithöfer A.** 2015. Systemic cytosolic Ca<sup>2+</sup> elevation is activated upon wounding and herbivory in *Arabidopsis*. *New Phytologist* **207**, 996–1004.

**Koo AJK, Howe GA.** 2009. The wound hormone jasmonate. *Phytochemistry* **70**, 1571–1580.

**Krasowski MD, Harrison NL.** 2000. The actions of ether, alcohol and alkane general anaesthetics on GABA<sub>A</sub> and glycine receptors and the effects of TM2 and TM3 mutations. *British Journal of Pharmacology* **129**, 731–743.

- Krausko M, Perutka Z, Šebela M, Šamajová O, Šamaj O, Novák O, Pavlovič A.** 2017. The role of electrical and jasmonate signalling in the recognition of captured prey in the carnivorous sundew plant *Drosera capensis*. *New Phytologist* **213**, 1818–1835.
- Krol E, Dziubinska H, Stolarz M, Trebacz K.** 2006. Effects of ion channel inhibitors on cold- and electrically-induced action potentials in *Dionaea muscipula*. *Biologia Plantarum* **50**, 411–416.
- Lam HM, Chiu J, Hsieh MH, Meisel L, Oliveira IC, Shin M, Coruzzi G.** 1998. Glutamate-receptor genes in plants. *Nature* **396**, 125–126.
- Lerner RA.** 1997. A hypothesis about the endogenous analogue of general anesthesia. *Proceedings of the National Academy of Sciences USA* **94**, 13375–13377.
- Libiaková M, Floková K, Novák O, Slováková E, Pavlovič A.** 2014. Abundance of cysteine endopeptidase Dionain in digestive fluid of Venus flytrap (*Dionaea muscipula* Ellis) is regulated by different stimuli from prey through jasmonates. *PLoS One* **9**, e104424.
- Livak KJ Schmittgen TD** 2001. Analysis of relative gene expression data using real-time quantitative PCR and the  $2^{-\Delta\Delta CT}$  method. *Methods* **25**, 402–408.
- MacIver BM, Tanelian DL.** 1990. Volatile anesthetics excite mammalian nociceptor afferents recorded in vitro. *Anesthesiology* **72**, 1022–1030.
- Maffei ME, Mithöfer A, Boland W.** 2007. Before gene expression: early events in plant-insect interaction. *Trends in Plant Science* **12**, 310–316.
- Martin DC, Plagenhoef M, Abraham J, Dennison RL, Aronstam RS.** 1995. Volatile anesthetics and glutamate activation of N-methyl-D-aspartate receptors. *Biochemical Pharmacology* **49**, 809–817.
- Meyer H.** 1899. Zur Theorie der Alkoholnarkose. *Archiv for Experimentelle Pathologie und Pharmakologie* **42**, 109–118.
- Milne A, Beamish T.** 1999. Inhalation and local anesthetics reduce tactile and thermal responses in *mimosa pudica*. *Canadian Journal of Anesthesia* **46**, 287–289.
- Mihic SJ, Ye Q, Wick MJ, et al.** 1997. Sites of alcohol and volatile anaesthetic action on GABA(A) and glycine receptors. *Nature* **389**, 385–389.
- Mousavi SAR, Chauvin A, Pascaud F, Kellenberger S, Farmer EE.** 2013. Glutamate receptor-like genes mediate leaf-to-leaf wound signals. *Nature* **500**, 422–426.
- Nguyen CT, Kurenda A, Stolz S, Chételat A, Farmer EE.** 2018. Identification of cell populations necessary for leaf-to-leaf electrical signaling in wounded plant. *Proceedings of the National Academy of Sciences USA* **115**, 10178–10183.
- Orser BA, Canning KJ, Macdonald JF.** 2002. Mechanisms of general anesthesia. *Current Opinion in Anesthesiology* **15**, 427–433.

**Overton CE.** 1901. *Studien über die Narkose zugleich ein Beitrag zur Allgemeinen Pharmakologie*. Fischer Verlag.

**Pan Z, Camara B, Gardner HW, Backhaus RA.** 1998. Aspirin inhibition and acetylation of the plant cytochrome P450, allene oxide synthase, resembles that of animal prostaglandin endoperoxide H Synthase. *The Journal of Biological Chemistry* **273**, 18139–18145.

**Paszota P, Escalante-Perez M, Thomsen LR, et al.** 2014. Secreted major Venus flytrap chitinase enables digestion of Arthropod prey. *Biochimica et Biophysica Acta* **1844**, 374–383.

**Patel AJ, Honoré E, Lesage F, Fink M, Romey G, Lazdunski M.** 1999. Inhalational anesthetics activate two-pore-domain background K<sup>+</sup> channels. *Nature Neuroscience* **2**, 422–426.

**Pauwels L, Inzé D, Goossens A.** 2009. Jasmonate-inducible gene: what does it mean? *Trends in Plant Science* **14**, 87–91.

**Pavlovič A, Jakšová J, Novák O.** 2017. Triggering a false alarm: wounding mimics prey capture in the carnivorous Venus flytrap (*Dionaea muscipula*). *New Phytologist* **216**, 927–938.

**Pavlovič A, Saganová M.** 2015. A novel insight into the cost–benefit model for the evolution of botanical carnivory. *Annals of Botany* **115**, 1075–1092.

**Pena-Cortés H, Albrecht T, Prat S, Weiler EW, Willmitzer L.** 1993. Aspirin prevents wound-induced gene expression in tomato leaves by blocking jasmonic acid biosynthesis. *Planta* **191**, 123–128.

**Peyronnet R, Tran D, Girault T, Frachisse J-M.** 2014. Mechanosensitive channels: feeling tension in a world under pressure. *Frontiers in Plant Science* **5**, 558.

**Pfaffl MW.** 2001. A new mathematical model for relative quantification in real-time RT–PCR. *Nucleic Acids Research* **29**, 2003–2007.

**Ramesh SA, Tyerman SD, Xu B, et al.** 2015. GABA signalling modulates plant growth by directly regulating the activity of plant-specific anion transporters. *Nature Communication* **6**, 7879.

**Ricciotti E, FitzGerald GA.** 2011. Prostaglandins and inflammation. *Arteriosclerosis, Thrombosis, and Vascular Biology* **31**, 986–1000.

**Rinaldi A.** 2014. Reawakening anaesthesia research. *EMBO Reports* **15**, 1113–1118.

**Risør MW, Thomsen LR, Sanggaard KW, et al.** 2016. Enzymatic and structural characterization of the major endopeptidase in the Venus flytrap digestion fluid. *Journal of Biological Chemistry* **291**, 2271–2287.



**Ryu SB, Wang X.** 1996. Activation of phospholipase D and the possible mechanism of activation in wound-induced lipid hydrolysis in castor bean leaves. *Biophysica et Biophysica Acta* **1303**, 243–250.

**Salvador-Recatalà V, Tjallingii WF, Farmer EE.** 2014. Real-time, in vivo intracellular recordings of caterpillar-induced depolarization waves in sieve elements using aphid electrodes. *New Phytologist* **203**, 674–684.

**Schägger H.** 2006. Tricine-SDS-PAGE. *Nature Protocols* **1**, 16–22.

**Scherzer S, Böhm J, Krol E, et al.** 2015. Calcium sensor kinase activates potassium uptake systems in gland cells of Venus flytraps. *Proceedings of the National Academy of Sciences, USA* **112**, 7309–7314.

**Scherzer S, Krol E, Kreuzer I, et al.** 2013. The *Dionaea muscipula* ammonium channel DmAMT1 provides NH<sub>4</sub><sup>+</sup> uptake associated with Venus flytrap's prey digestion. *Current Biology* **23**, 1649–1657.

**Scherzer S, Shabala L, Hedrich B, et al.** 2017. Insect haptoelectrical stimulation of Venus flytrap triggers exocytosis in gland cells. *Proceedings of the National Academy of Sciences USA* **114**, 4822–4827.

**Schulze WX, Sanggaard KW, Kreuzer I, et al.** 2012. The protein composition of the digestive fluid from the Venus flytrap sheds light on prey digestion mechanisms. *Molecular and Cellular Proteomics* **11**, 1306–1319.

**Sheard LB, Tan X, Mao H, et al.** 2010. Jasmonate perception by inositolphosphate-potentiated COI-JAZ co-receptor. *Nature* **468**, 400–407.

**Staswick PE, Tiryaki I.** 2004. The oxylipin signal jasmonic acid is activated by an enzyme that conjugates it to isoleucine in *Arabidopsis*. *The Plant Cell* **16**, 2117–2127.

**Stintzi A, Weber H, Reymond P, Browse J, Farmer E.** 2001. Plant defense in the absence of jasmonic acid: the role of cyclopentanones. *Proceedings of the National Academy of Sciences USA* **98**, 12837–12842.

**Swiatek A, Lenjou M, Van Bockstaele D, Inzé D, Van Onckelen H.** 2002. Differential effect of jasmonic acid and abscisic acid on cell cycle progression in tobacco BY-2 cells. *Plant Physiology* **128**: 201–211.

**Tang P, Xu Y.** 2002. Large-scale molecular dynamics simulations of general anesthetic effects on the ion channel in the fully hydrated membrane: The implication of molecular mechanisms of general anesthesia. *Proceedings of the National Academy of Sciences USA* **99**, 16035–16040.

**Thines B, Katsir L, Melotto M, et al.,** 2007. JAZ repressor proteins are targets of the SCF(COI1) complex during jasmonate signalling. *Nature* **448**, 661–665.

**Toyota M, Spencer D, Sawai-Toyota S, Jiaqi W, Zhang T, Koo AJ, Howe GA, Gilroy S.** 2018. Glutamate triggers long-distance, calcium-based plant defense signaling. *Science* **361**, 1112–1114.

**Volkov AG.** 2019. Signaling in electrical networks of the Venus flytrap (*Dionaea muscipula* Ellis). *Bioelectrochemistry* **125**, 25-32

**Volkov AG, Adesina T, Markin VS, Jovanov E.** 2008. Kinetics and mechanism of *Dionaea muscipula* trap closing. *Plant Physiology* **146**, 694-702.

**Volkov AG, Carrell H, Baldwin A, Markin VS.** 2009. Electrical memory in Venus flytrap. *Bioelectrochemistry* **75**, 142-147.

**Wang C, Zien CA, Afithile M, Welti R, Hildebrand DF, Wang X.** 2000. Involvement of phospholipase D in wound-induced accumulation of jasmonic acid in *Arabidopsis*. *The Plant Cell* **12**, 2237–2246.

**Weiland M, Mancuso S, Baluška F.** 2016. Signalling via glutamate and GLRs in *Arabidopsis thaliana*. *Functional Plant Biology* **43**, 1–25.

**Weir CJ.** 2006. The molecular mechanisms of general anaesthesia: dissecting the GABAA receptor. *Continuing Education in Anaesthesia Critical Care & Pain* **6**, 49–53.

**Wildon DC, Thain JF, Minchin PEH et al.,** 1992. Electrical signalling and systemic proteinase inhibitor induction in the wounded plant. *Nature* **360**, 62–65.

**Yan C, Fan M, Yang M, Zhao J, Zhang W, Su Y, Xiao L, Deng H, Xie D.** 2018. Injury activates Ca<sup>2+</sup>/calmodulin-dependent phosphorylation of JAV1-JAZ8-WRKY51 complex for jasmonate biosynthesis. *Molecular Cell* **70**, 136-149.

**Yokawa K, Kagenishi T, Baluška F.** 2019. Anesthetics, Anesthesia, and Plants. *Trends in Plant Science* **24**, 12-14

**Yokawa K, Kagenishi T, Pavlovič A, Gall S, Weiland M, Mancuso S, Baluška F.** 2018. Anaesthetics stop diverse plant organ movements, affect endocytic vesicle recycling and ROS homeostasis, and block action potentials in Venus flytraps. *Annals of Botany* **122**, 747-756.

**Zhou C, Liu J, Chen X-D.** 2012. General anesthesia mediated by effects on ion channels. *World Journal of Critical Care Medicine* **1**, 80–93.

**Žárský V.** 2015. Signal transduction: GABA receptor found in plants. *Nature Plants* **1**, article number 15115.

## Figure legends

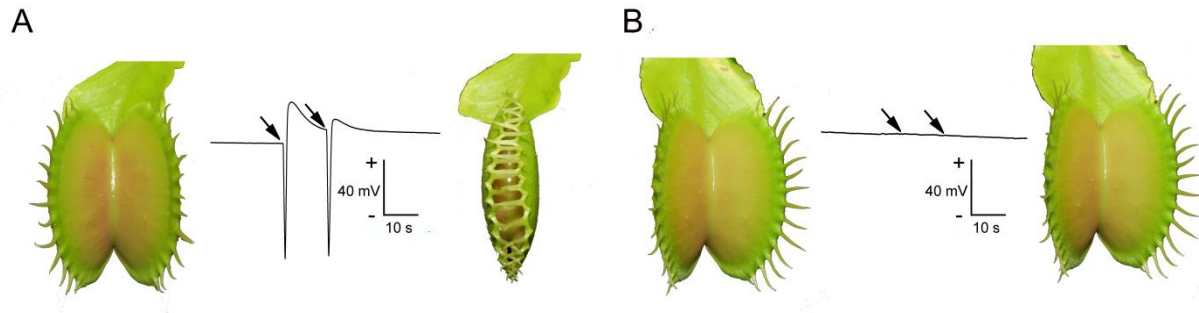

**Fig. 1** Electrical signalling in the Venus flytrap (*Dionaea muscipula*) under anaesthesia with diethyl ether. (A) Two touches of trigger hairs (arrows) or wounds generate two action potentials and rapid trap closure. (B) Action potentials are not generated in response to two touches (arrows) when exposed to diethyl ether.

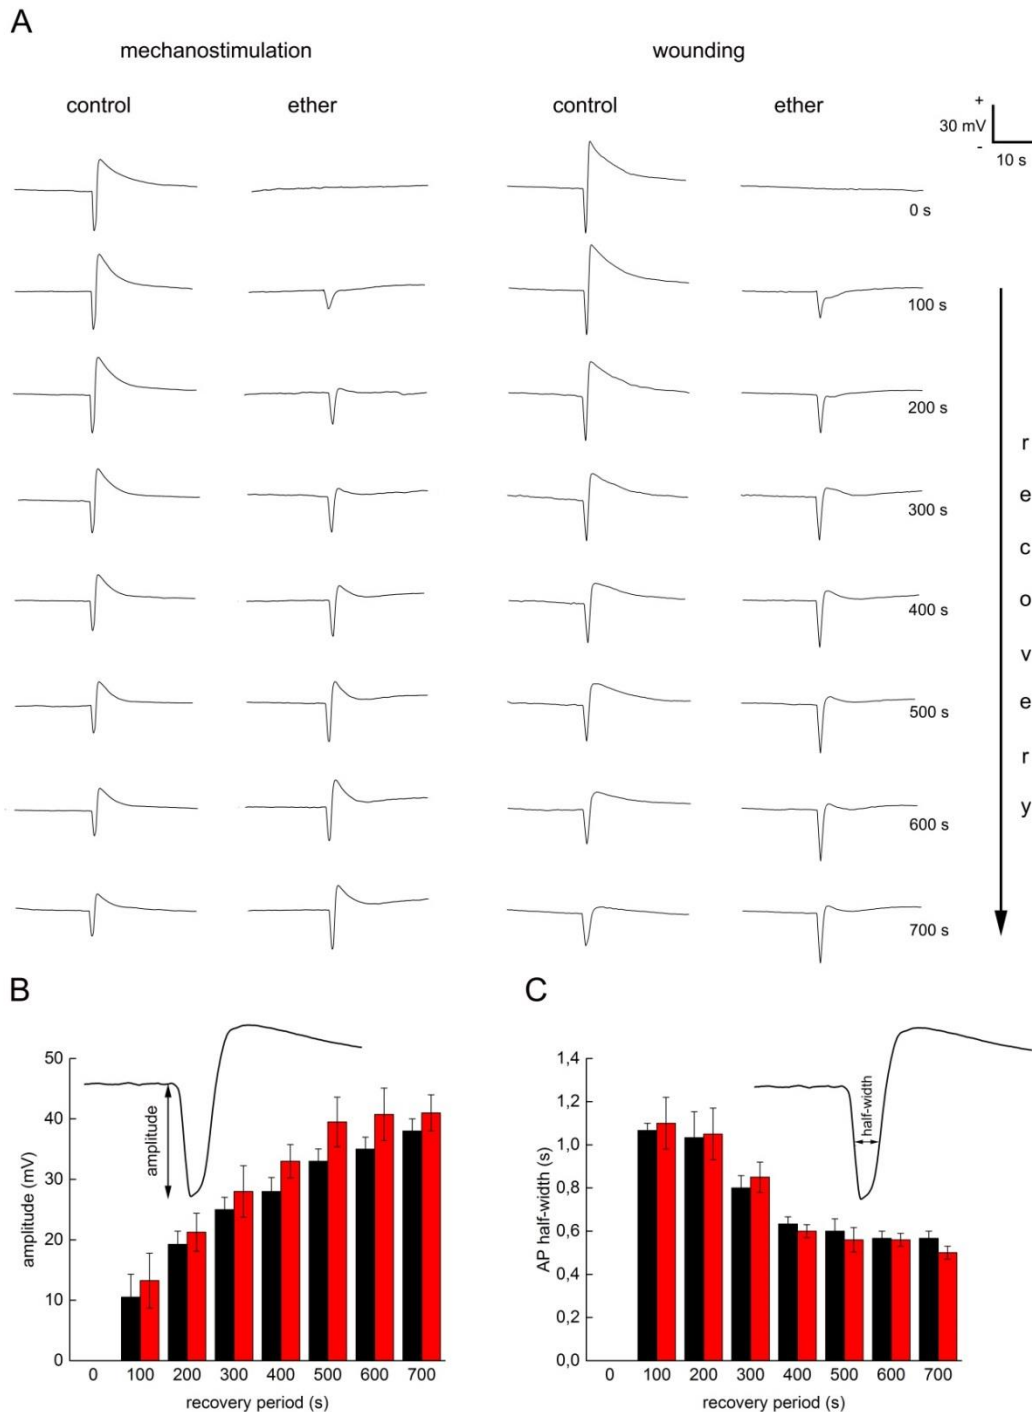

**Fig. 2** Recovery of electrical signalling after removing of diethyl ether in the Venus flytrap (*Dionaea muscipula*). (A) Recovery of action potentials in response to mechanical stimulation and wounding. The representative APs from four independent experiments are depicted. (B) Recovery of action potential amplitude. (C) Recovery of action potential spike half-width. Black bars – mechanostimulation, red bars – wounding. Means  $\pm$  S.E.,  $n = 4$ . There were not significant differences between APs generated in response to wounding and mechanical stimulation.

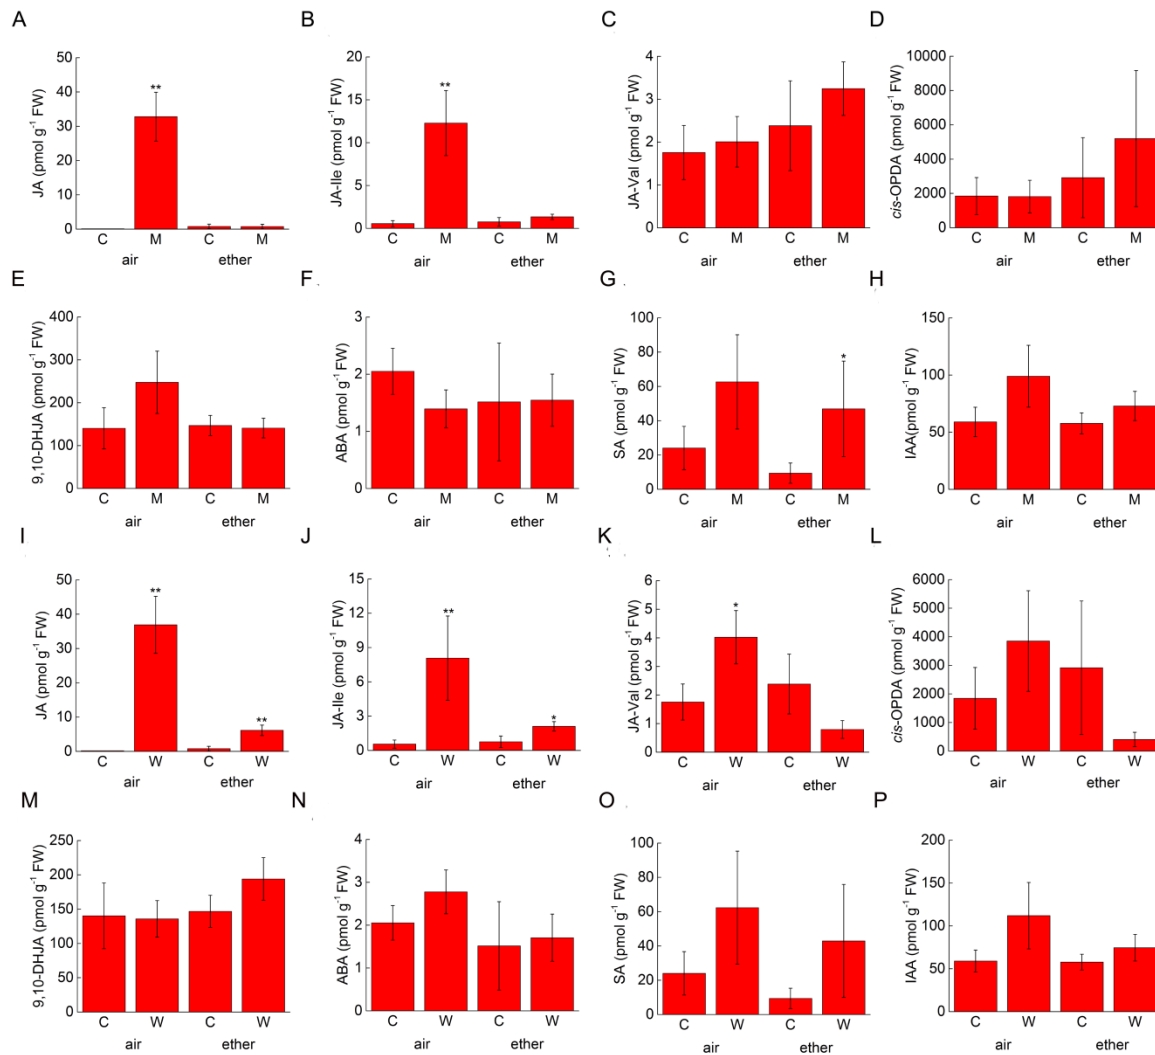

**Fig. 3** Accumulation of phytohormones in trap tissue of the Venus flytrap (*Dionaea muscipula*) two hours after mechanostimulation and wounding in the air and under anaesthesia with diethyl ether. (A-H) mechanostimulation, (I-P) wounding. (A,I) Jasmonic acid (JA), (B,J) isoleucine conjugate of jasmonic acid (JA-Ile), (C,K) valine conjugate of jasmonic acid (JA-Val), (D,L) *cis*-12-oxo-phytodienoic acid (*cis*-OPDA), (E,M) 9,10-dihydrojasmonic acid (9,10-DHJA), (F,N) abscisic acid (ABA), (G,O) salicylic acid (SA), (H,P) indole-3-acetic acid (IAA). C - control, M -mechanostimulation, W - wounding. Means  $\pm$  S.D. from four biological replicates, n = 4. Significant differences evaluated by two-tailed Student *t*-test between control and mechanostimulation and control and wounding in the air or diethyl ether are denoted by asterisks at P < 0.01 (\*\*), P < 0.05 (\*).

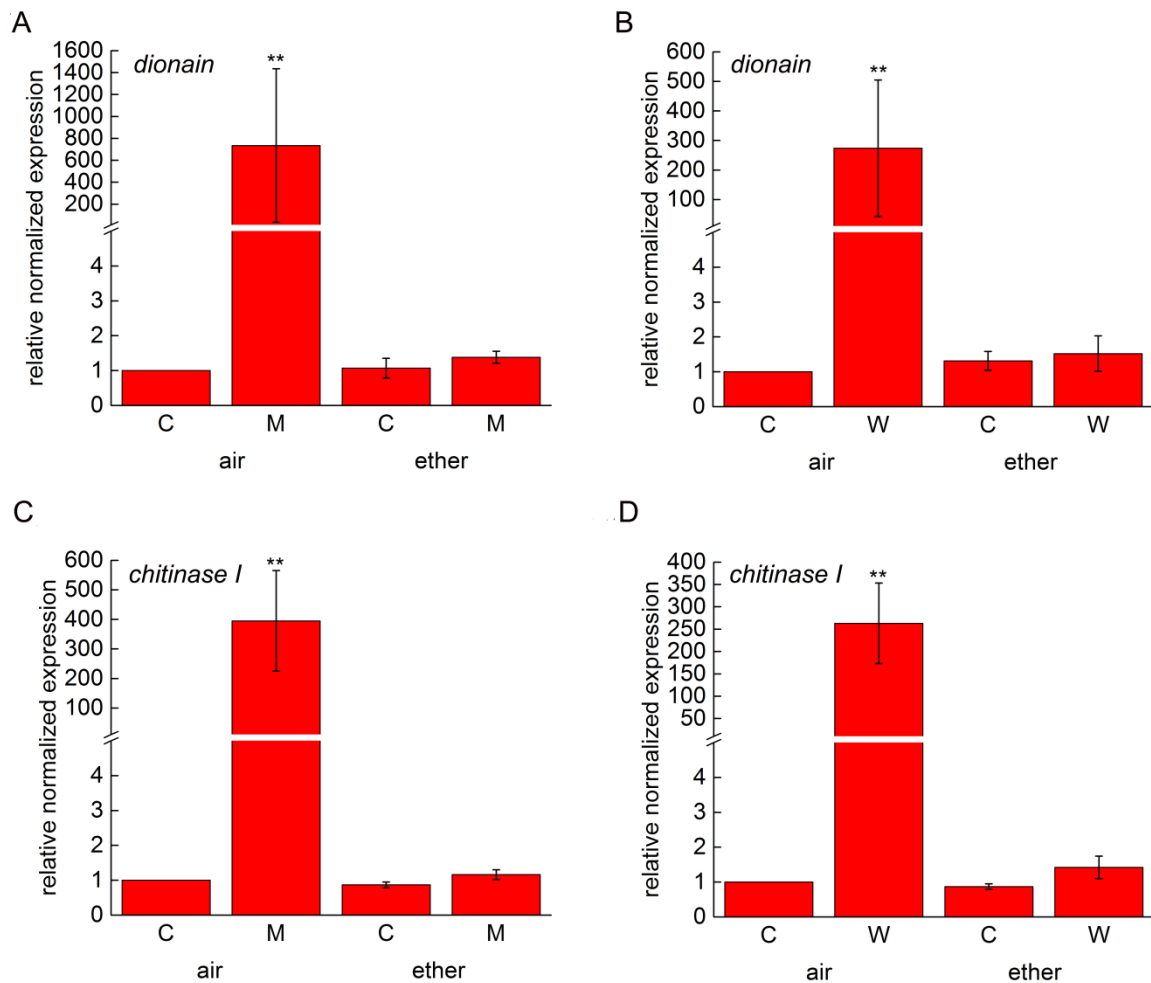

**Fig. 4** Gene expression in the air and under anaesthesia with diethyl ether in the Venus flytrap (*Dionaea muscipula*). The traps were kept in the air or under diethyl ether for two hours and then 40-times mechanostimulated or pierced/wounded by needle for the next two hours. Then the diethyl ether was removed and trap tissue was sampled for qPCR after 10 hours. (A) Relative expression of dionain after mechanostimulation and (B) wounding. (C) Relative expression of chitinase after mechanostimulation and (D) wounding. Gene expression for non-stimulated control in the air was set up as 1. Mean expression  $\pm$  S.E. from four biological replicates ( $n = 4$ ). Significant differences evaluated by two-tailed Student *t*-test between control and mechanostimulation and control and wounding in the air or diethyl ether are denoted by asterisks at  $P < 0.01$  (\*\*).

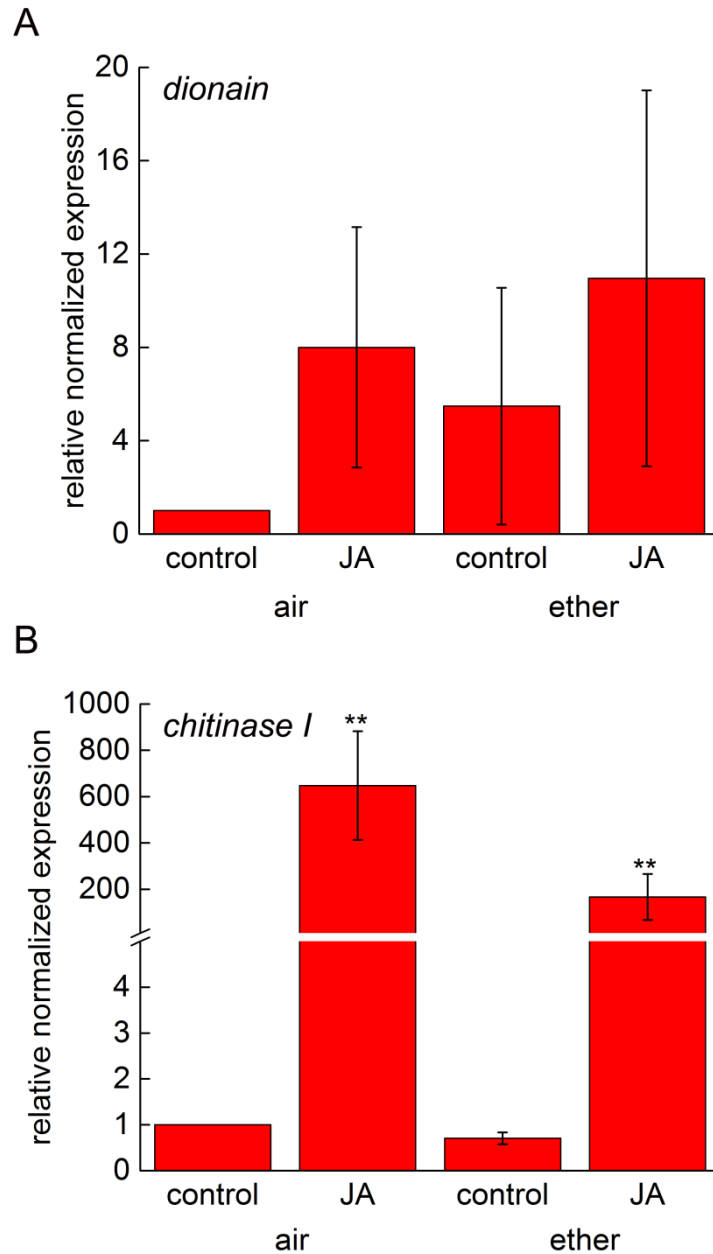

**Fig. 5** Gene expression in response to exogenous application of 2 mM jasmonic acid after 7 hours in the air or under diethyl ether in the Venus flytrap (*Dionaea muscipula*). The plants were kept in the air or under diethyl ether for two hours and then few drops of jasmonic acid were applied on trap surface. The plants were kept in the same conditions for the next seven hours and then the traps were sampled for qPCR. (A) Relative expression of *dionain*. (B) Relative expression of *chitinase I*. Mean expression  $\pm$  S.E. from four biological replicates ( $n = 4$ ). Significant differences evaluated by two-tailed Student *t*-test between control and mechanostimulation and control and wounding in the air or diethyl ether are denoted by asterisks at  $P < 0.01$  (\*\*).
